# Supplementary material
Source: Royal Society of Chemistry journal article supplement (doi:10.1039/d6cc01621a)
Supplement: d6cc01621a1.pdf [file d6cc01621a1.pdf]

## Supporting Information

# HSC-Targeted Nanoplatfom for Cascade-Responsive Imaging of Mitochondrial H<sub>2</sub>O<sub>2</sub>-Viscosity and Synergistic Melatonin-Based Antioxidant Therapy in Hepatic Ischemia-Reperfusion Injury

*Yiru Wang,<sup>†a</sup> Yichen Liu,<sup>†c</sup> Yuting Sheng,<sup>†a</sup> Wen Zhang,<sup>\*a</sup> Xin Wang,<sup>a</sup> Hui Wang,<sup>a</sup> Wei Zhang<sup>a</sup> and Ping Li<sup>\*a,b</sup>*

<sup>a</sup> College of Chemistry, Chemical Engineering and Materials Science, Collaborative Innovation Center of Functionalized Probes for Chemical Imaging in Universities of Shandong, Key Laboratory of Molecular and Nano Probes, Ministry of Education, Institutes of Biomedical Sciences, Shandong Normal University, Jinan 250014, Shandong, People's Republic of China

<sup>b</sup> College of Chemistry and Chemical Engineering, Northwest Normal University, Lanzhou 730070, People's Republic of China

<sup>c</sup> Aulin College, Northeast Forestry University, Harbin 150040, People's Republic of China

E-mail: lip@sdsu.edu.cn and zhangwen@sdsu.edu.cn

## Table of Contents

|                                                                                                                        |     |
|------------------------------------------------------------------------------------------------------------------------|-----|
| Experimental Procedures .....                                                                                          | S4  |
| Reagents and Apparatus .....                                                                                           | S4  |
| Preparation of ROS/RNS .....                                                                                           | S4  |
| Synthesis .....                                                                                                        | S5  |
| Determination of encapsulation efficiency and drug loading capacity .....                                              | S6  |
| Selectivity evaluation.....                                                                                            | S6  |
| Quantum yield determination of BESI .....                                                                              | S7  |
| Calculation of radiation and non-radiation decay coefficients .....                                                    | S7  |
| Cell culture.....                                                                                                      | S7  |
| Cell viability assay.....                                                                                              | S7  |
| Cellular fluorescence imaging .....                                                                                    | S8  |
| Establishment of the hepatic ischemia–reperfusion injury model.....                                                    | S8  |
| Fluorescence imaging experiments of mice .....                                                                         | S9  |
| Proteomic analysis .....                                                                                               | S9  |
| Hematoxylin and eosin staining of major organs .....                                                                   | S9  |
| Assessment of intracellular ROS level .....                                                                            | S9  |
| Statistical analysis.....                                                                                              | S9  |
| Supplemental Table and Figures .....                                                                                   | S10 |
| Table S1. Photophysical data of H <sub>2</sub> O <sub>2</sub> -activated BESI. ....                                    | S10 |
| Fig. S1. Fluorescence response of BESI at different H <sub>2</sub> O <sub>2</sub> concentrations. ....                 | S10 |
| Fig. S2. The linear relationship between fluorescence intensity and H <sub>2</sub> O <sub>2</sub> concentrations...S10 |     |
| Fig. S3. Fluorescence response of H <sub>2</sub> O <sub>2</sub> -activated BESI .....                                  | S11 |
| Fig. S4. Linear relationship between log F583 and log η.....                                                           | S11 |
| Fig. S5. Photostability evaluation of BESI .....                                                                       | S11 |
| Fig. S6. Fluorescence response of BESI at different pH values.....                                                     | S12 |
| Fig. S7. Effects of solvent polarity on BESI .....                                                                     | S12 |
| Fig. S8. The photostability of BESI in LX-2 cells .....                                                                | S12 |
| Fig. S9. Cell viability assay of BESI .....                                                                            | S13 |
| Fig. S10. Fluorescence imaging of living HSC .....                                                                     | S13 |
| Fig. S11. Co localization imaging of HSC .....                                                                         | S14 |
| Fig. S12. Absorption spectrum of ATRA-BESI .....                                                                       | S14 |
| Fig. S13. Particle size distribution of ATRA-BESI and Lip-BESI .....                                                   | S15 |
| Fig. S14. Zeta potential distribution of Lip-BESI .....                                                                | S15 |
| Fig. S15. Zeta potential distribution of ATRA-BES .....                                                                | S15 |
| Fig. S16. TEM image of ATRA-BESI .....                                                                                 | S16 |
| Fig. S17. Colloidal stability of ATRA-BESI.....                                                                        | S16 |
| Fig. S18. Cell viability assay of ATRA-BESI.....                                                                       | S16 |
| Fig. S19. Effects of ATRA-BESI on the body weight of mice .....                                                        | S17 |
| Fig. S20. Targeted experiments of ATRA-BESI.....                                                                       | S17 |
| Fig. S21. Ex vivo fluorescence imaging of major organs from mice .....                                                 | S17 |
| Fig. S22. H&E staining of liver tissues. ....                                                                          | S18 |
| Fig. S23. Proteomic analysis through LC-MS/MS.....                                                                     | S18 |
| Fig. S24. Absorption spectra of ATRA-BESI-MEL and MEL .....                                                            | S18 |

|                                                            |     |
|------------------------------------------------------------|-----|
| Fig. S25. Particle size distribution of ATRA-BESI-MEL..... | S19 |
| Fig. S26. TEM image of ATRA-BESI-MEL.....                  | S19 |
| Fig. S27. Zeta potential plot of ATRA-BESI-MEL .....       | S19 |
| Fig. S28. Colloidal stability of ATRA-BESI-MEL .....       | S20 |
| Fig. S29. Drug release curve.....                          | S20 |
| Fig. S30. Cell viability assay of ATRA-BESI-MEL .....      | S20 |
| Fig. S31. HRMS of BESI. ....                               | S21 |
| Fig. S32. <sup>1</sup> H NMR of compound 1... ..           | S21 |
| Fig. S33. <sup>1</sup> H NMR of BESI. ....                 | S22 |
| Fig. S34. <sup>13</sup> C NMR of BESI .....                | S22 |
| References.....                                            | S23 |

## Experimental Procedures

### Reagents and Apparatus

Iodomethane, trimethylphenylindole, sodium acetate, and 4-formylphenylboronic acid pinacol ester were purchased from Shanghai Macklin Biochemical Technology Co., Ltd. All solvents were supplied by Sinopharm Chemical Reagent Co., Ltd. Soybean lecithin, cholesterol, vitamin A acid, nystatin, and LPS were from Shanghai Aladdin Biochemical Technology Co., Ltd. ELISA for p-AMPK, ACC2, and CPT1 were obtained from Jiangsu Enzyme Immunoassay Industrial Co., Ltd. MDA and  $\alpha$ -SMA assay kits were purchased from Shanghai Tongwei Biotechnology Co., Ltd. ALT, AST, and BCA assay kits were provided by Elabscience Biotechnology Co., Ltd. UV-visible absorption spectra were recorded using a Thermo Scientific Evolution 220 spectrophotometer. Fluorescence spectra were measured with a Hitachi F-4700 fluorescence spectrophotometer. Cell viability was evaluated via CCK-8 assay using a Triturus microplate reader. Confocal fluorescence imaging was performed on a Leica SP8 high-resolution fluorescence microscope. The mass spectra were conducted with a Bruker Maxis ultra-high-resolution-TOF MS system. Proteomic analysis was performed by LC-MS/MS on a Thermo Fisher Q Exactive mass spectrometer. H&E-stained images were acquired using a Leica DM2500 optical microscope.  $^1\text{H}$  NMR spectra were recorded at 400 MHz, and  $^{13}\text{C}$  NMR spectra were recorded at 100 MHz with Bruker NMR spectrometers.

### Preparation of ROS/RNS

$\text{O}_2^{\cdot-}$  was produced from  $\text{KO}_2$  in dry DMSO by an ultrasonic method<sup>1</sup>. The concentration of  $\text{O}_2^{\cdot-}$  was determined from the absorption at 250 nm ( $\epsilon = 2682 \text{ M}^{-1} \text{ cm}^{-1}$ ). 0.6 M  $\text{NaNO}_2$ , 0.6 M  $\text{HCl}$ , and 0.7 M  $\text{H}_2\text{O}_2$  were added simultaneously to a 3 M  $\text{NaOH}$  solution at 0 °C to get  $\text{ONOO}^-$ . The concentration of  $\text{ONOO}^-$  was determined using the extinction coefficient of  $1670 \text{ M}^{-1} \text{ cm}^{-1}$  at 302 nm in 0.1 M  $\text{NaOH}$  (aq.).  $\text{H}_2\text{O}_2$  solutions were accessed by dilution of 30% hydrogen peroxide aqueous solution; the concentration was determined from the absorption at 240 nm ( $\epsilon = 43.6 \text{ M}^{-1} \text{ cm}^{-1}$ ). TBHP solutions were accessed by dilution of 70 % tert-butyl hydroperoxide aqueous solution.  $\cdot\text{OH}$  was generated by the Fenton reaction of  $\text{FeCl}_2$  with  $\text{H}_2\text{O}_2$  (1:6) in deionized water.  $\text{NO}$  was obtained from a stock solution prepared with sodium nitroprusside.  $^1\text{O}_2$  was prepared by the reaction of 10 mM of  $\text{NaClO}$  and 10 mM of  $\text{H}_2\text{O}_2$  in PBS buffer solutions (pH = 7.4).

## Synthesis

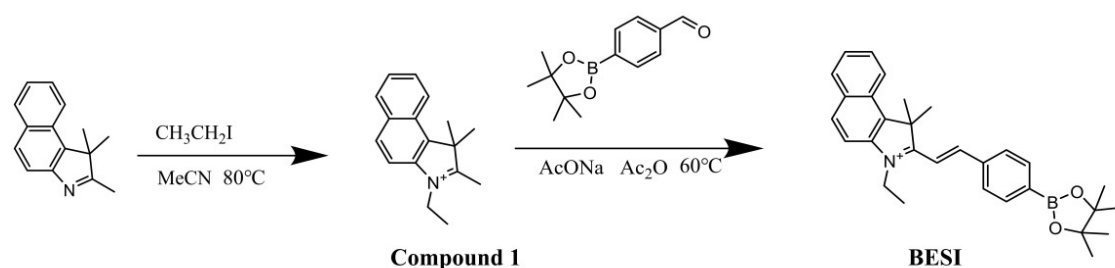

**Scheme S1.** The syntheses of BESl.

**Synthesis of Compound 1.** Compound 1 was prepared according to a reported method.<sup>2-4</sup> Trimethylphenylindole (9.6 mmol) and ethyl iodide (14.4 mmol) were dissolved in acetonitrile and refluxed at  $80^\circ\text{C}$  for 24 hours. The mixture was then precipitated with diethyl ether to afford compound 1 (1.826 g, 7.6 mmol, 80%). HRMS data,  $m/z$  calculated for  $[\text{C}_{17}\text{H}_{20}\text{N}^+]$ , 238.1591, found 238.1646.  $^1\text{H NMR}$  (400 MHz,  $\text{DMSO-d}_6$ )  $\delta$  8.40 (d,  $J = 7.5$  Hz, 1H), 8.32 (d,  $J = 8.9$  Hz, 1H), 8.24 (d,  $J = 8.2$  Hz, 1H), 8.19 (d,  $J = 8.9$  Hz, 1H), 7.86 - 7.77 (m, 1H), 7.77 - 7.70 (m, 1H), 4.65 (q,  $J = 7.3$  Hz, 2H), 2.97 (s, 3H), 1.78 (s, 6H), 1.52 (t,  $J = 7.3$  Hz, 3H).

**Synthesis of BESl.** 4-Formylphenylboronic acid pinacol cyclic ester (316 mg, 1.36 mmol), sodium acetate (106 mg, 1.3 mmol), and compound 1 (472 mg, 1.3 mmol) were added to 10 mL of acetic anhydride, and the mixture was stirred at  $60^\circ\text{C}$  for 8 hours. The crude product was purified by column chromatography, eluted with methanol/dichloromethane (1:15, v/v), dried by rotary evaporation, and filtered under vacuum to afford the deep red solid BESl (yield 50%). HRMS data,  $m/z$  calculated for  $[\text{C}_{30}\text{H}_{35}\text{BNO}_2^+]$ : 452.2756, found 452.2742.  $^1\text{H NMR}$  (400 MHz,  $\text{DMSO-d}_6$ )  $\delta$  8.58 (d,  $J = 16.5$  Hz, 1H), 8.47 (d,  $J = 8.3$  Hz, 1H), 8.36–8.18 (m, 5H), 7.91–7.74 (m, 5H), 4.94 (q,  $J = 7.3$  Hz, 2H), 2.07 (s, 6H), 1.57 (t,  $J = 7.3$  Hz, 3H), 1.35 (s, 12H).

**Synthesis of ATRA-BESl.** 35 mg of soybean lecithin, 10 mg of cholesterol, and 5 mg of all-trans retinoic acid (ATRA) were dissolved in 20 mL of methanol, and sonicated until complete dissolution. Subsequently, 0.8 mg BESl was added to the solution and further treated with ultrasonication to ensure thorough dissolution. The mixture was concentrated under reduced pressure using a rotary evaporator until a uniform liposome film formed on the inner wall of the flask. After vacuum drying overnight, 2 mL of purified water was added for hydration, and the liposomes were uniformly dispersed in the aqueous solution via ultrasonication. Finally, the solution containing liposomes was sequentially filtered through  $0.45\ \mu\text{m}$  and  $0.22\ \mu\text{m}$  pore-size aqueous

microporous membranes (PVDF material), each for three times, ultimately obtaining a homogeneous liposome nanodispersion system.

**Synthesis of ATRA-BESI-MEL.** 35 mg of soybean lecithin, 10 mg of cholesterol, and 2 mg of all-trans retinoic acid were dissolved in 20 mL of methanol and ultrasonically treated until complete dissolution. Subsequently, 0.6 mg of BESI and 3 mg of MEL were added into the solution and sonicated until completely dissolved. The mixture was concentrated under reduced pressure using a rotary evaporator until a uniform liposome film formed on the inner wall of the flask. After vacuum drying overnight, 2 mL of purified water was added for hydration, and the liposomes were uniformly dispersed in the aqueous solution via ultrasonication. Finally, the solution containing liposomes was sequentially filtered through 0.45  $\mu\text{m}$  and 0.22  $\mu\text{m}$  pore-size aqueous microporous membranes (PVDF material), each for three times, ultimately obtaining a homogeneous liposome nanodispersion system.

#### **Determination of encapsulation efficiency and drug loading capacity**

After dissociation of liposomes using the solvent emulsion breaking method (80% methanol solution), the encapsulation efficiency (EE) was calculated according to the standard calibration curve of the free probe in the methanol-water system using the following formula:

$$EE = (\text{total drug amount} - \text{free drug amount}) / \text{total drug amount} \times 100\%$$

In addition, the drug loading capacity (DL) is determined by the following formula:

$$DL = (\text{drug mass} / \text{total carrier mass}) \times 100\%$$

#### **Selectivity evaluation**

In the selectivity experiments (Fig. 1E), the BESI (10  $\mu\text{M}$ ) solution was treated with various analytes, including metal ions, ROS, RNS, and amino acids. The concentrations of each analytes were as follows: 1-25, Blank, 10 mM  $\text{Na}^+$ , 10 mM  $\text{K}^+$ , 1 mM  $\text{Ca}^{2+}$ , 100  $\mu\text{M}$   $\text{Mg}^{2+}$ , 1 mM  $\text{Zn}^{2+}$ , 100  $\mu\text{M}$   $\text{Cu}^{2+}$ , 100  $\mu\text{M}$   $\text{Cu}^+$ , 100  $\mu\text{M}$   $\text{Al}^{3+}$ , 100  $\mu\text{M}$   $\text{Fe}^{3+}$ , 100  $\mu\text{M}$   $\text{Fe}^{2+}$ , 10  $\mu\text{M}$   $\text{O}_2^-$ , 100  $\mu\text{M}$   $\text{ClO}^-$ , 100  $\mu\text{M}$   $^1\text{O}_2$ , 100  $\mu\text{M}$   $\cdot\text{OH}$ , 100  $\mu\text{M}$   $\text{NO}$ , 100  $\mu\text{M}$   $\text{ONOO}^-$ , 100  $\mu\text{M}$  His, 100  $\mu\text{M}$  Cys, 100  $\mu\text{M}$  Hcy, 100  $\mu\text{M}$  GSH, 100  $\mu\text{M}$  Arg, 100  $\mu\text{M}$  Lys, 200  $\mu\text{M}$   $\text{H}_2\text{O}_2$  and coexisting 200  $\mu\text{M}$   $\text{H}_2\text{O}_2$  and 90% glycerol. The incubation time was 30 minutes at 37  $^\circ\text{C}$ . For the selectivity study of Fig. 1F, BESI was first incubated with 100  $\mu\text{M}$   $\text{H}_2\text{O}_2$ , followed by the addition of each interfering species (1-25): Blank, 10 mM  $\text{Na}^+$ , 10 mM  $\text{K}^+$ , 1 mM  $\text{Ca}^{2+}$ , 100  $\mu\text{M}$   $\text{Mg}^{2+}$ , 1 mM  $\text{Zn}^{2+}$ , 100  $\mu\text{M}$   $\text{Cu}^{2+}$ , 100  $\mu\text{M}$   $\text{Cu}^+$ , 100  $\mu\text{M}$   $\text{Al}^{3+}$ , 100  $\mu\text{M}$   $\text{Fe}^{3+}$ , 100  $\mu\text{M}$   $\text{Fe}^{2+}$ , 10  $\mu\text{M}$   $\text{O}_2^-$ , 100  $\mu\text{M}$   $\text{ClO}^-$ , 100  $\mu\text{M}$   $^1\text{O}_2$ , 100  $\mu\text{M}$   $\cdot\text{OH}$ , 100  $\mu\text{M}$

NO, 100  $\mu\text{M}$  ONOO<sup>-</sup>, 100  $\mu\text{M}$  His, 100  $\mu\text{M}$  Cys, 100  $\mu\text{M}$  Hcy, 100  $\mu\text{M}$  GSH, 100  $\mu\text{M}$  Arg, 100  $\mu\text{M}$  Lys, 200  $\mu\text{M}$  H<sub>2</sub>O<sub>2</sub> and coexisting 200  $\mu\text{M}$  H<sub>2</sub>O<sub>2</sub> and 90% glycerol. The incubation time was 45 minutes at 37 °C. Fluorescence spectra were measured using an excitation wavelength of 520 nm and an emission wavelength of 590 nm. All measurements were performed in triplicate, and the data represent the mean  $\pm$  S.D.

### **Quantum yield determination of BESI**

The fluorescence quantum yield of BESI was calculated using the comparative method described in previous publications<sup>1</sup>, with crystal violet (CV) in methanol ( $\Phi= 0.54$ ) as the reference standard. The absorbance values of BESI and CV solutions at five different concentrations were measured, followed by the collection and integration of their fluorescence emission spectra. The quantum yield was calculated using the equation:

$$\Phi_{f, \text{sam}} = \Phi_{f, \text{ref}} \times (n_{\text{sam}}^2 / n_{\text{ref}}^2) (K_{\text{sam}} / K_{\text{ref}})$$

Where  $\Phi_{f, \text{sam}}$  and  $\Phi_{f, \text{ref}}$  denote the fluorescence quantum yield of the sample and reference, respectively; K represents the slope of the integrated fluorescence intensity vs. absorbance plot; and n is the refractive index of the solvent.

### **Calculation of radiation and non-radiation decay coefficients**

The radiative ( $k_r$ ) and non-radiative ( $k_{nr}$ ) decay coefficients were calculated using the fluorescence lifetime ( $\tau$ ) and quantum yield ( $\Phi$ ) based on the standard method described in the literature<sup>5</sup>:

$$k_r = \Phi/\tau$$

$$k_{nr} = 1/\tau - k_r$$

### **Cell culture**

HL-7702, RAW264.7, and LX-2 cells were purchased from the Cell Bank of the Chinese Academy of Sciences (Shanghai, China). HL-7702, RAW264.7, and LX-2 cells were cultured in high-glucose DMEM supplemented with 10% fetal bovine serum, 1% penicillin, and 1% streptomycin ( $w v^{-1}$ ) at 37 °C in a 5% CO<sub>2</sub>/ 95% air MCO-15AC incubator (SANYO, Tokyo, Japan).

### **Cell viability assay**

The cell counting kit-8 (CCK-8) assay was employed to assess the effects of BESI, ATRA-BESI, and ATRA-BESI-MEL on LX-2 cell viability. First, cells were seeded into 96-well plates, followed by the addition of different concentrations of BESI, ATRA-BESI, or ATRA-BESI-MEL. The wells were then incubated with the cells for 24 h. Subsequently, CCK-8 reagent (10  $\mu\text{L}$  well<sup>-1</sup>) was added.

After 2 h, the absorbance of the solution at 450 nm was measured using a Triturus microplate reader.

### **Cellular fluorescence imaging**

Cells were seeded on 15 mm glass-bottom dishes and cultured for 24 h. The living cells were treated with different agents. Then, the cells were washed three times with 1.0 mL PBS before imaging. All the fluorescence images were obtained on a Leica SP8 high-resolution fluorescence microscope. The excitation wavelength of the BEI was 561 nm, and the corresponding red channel of 580-640 nm emission wavelength was collected. For the co-localization experiment, the imaging parameters were as follows: All collection windows were 500-520 nm with excitation at 488 nm for 75 nM MitoTracker Green, 75 nM LysoTracker Green, 100 nM EndoTracker Green, and 100 nM GolgiTracker Green. Each experiment was repeated at least three times with identical results.

### **Establishment of the hepatic ischemia–reperfusion injury model**

At the cellular level, ischemia–reperfusion injury was simulated via oxygen-glucose-serum deprivation/reperfusion. LX-2 cells were subjected to ischemia by culturing in glucose-free and serum-free DMEM supplemented with deoxygenated sodium dithionite (0.15 mM) for 30 min. Reperfusion was induced by replacing the medium with standard high-glucose, serum-containing DMEM under 5% CO<sub>2</sub> and 95% O<sub>2</sub> conditions for 30 min.

In the mouse model, a 70% partial hepatic ischemia–reperfusion injury (HIRI) model was established in 6-week-old male C57BL/6J mice via simulating liver surgery. The mice in the HIRI group were given a laparotomy to expose the liver, and the portal vein and hepatic artery of the median and the left lateral lobes were clamped with a microvessel clip for 1 h to induced 70 % partial hepatic ischemia. Subsequently, the vascular clamp was released for 1 h of reperfusion. Control mice underwent identical surgical procedures without vascular clamping. All mice were anesthetized during surgery. All in vivo experiments, including hepatic surgery in mice, were approved by the Ethical Committee of Shandong Normal University (Approval No. AEECSDNA2025159) and conducted in compliance with national regulations, international guidelines, and institutional standards at Shandong Normal University.

### **Fluorescence imaging experiments of mice**

The experiments utilized 6-week-old C57BL/6J mice. All mice received intravenous injections of

ATRA-BESI (0.1 mg/g). The mice were anesthetized prior to injection and during imaging procedures. For the normal group, the liver was exposed as a control. During the laparotomy surgery, the mice were anesthetized by inhaling isoflurane. Images were gathered using the IVIS Lumina II in vivo imaging system with an excitation of 520 nm and an emission window of  $570 \pm 10$  nm. All animal experiment methods were approved by the Animal Experiment Ethical Review Committee of Shandong Normal University (Approval No. AEECSDNAU2025190) and conducted in compliance with national regulations, international guidelines, and institutional standards at Shandong Normal University.

### **Proteomic analysis**

LKB1 ( $1.0 \text{ mg mL}^{-1}$ ) was incubated for 3 h at  $37^\circ\text{C}$  in buffer (10 mM PBS, pH 7.4) supplemented with 1 mM  $\text{H}_2\text{O}_2$ . Samples were lyophilized, digested with trypsin, and peptides were purified via C18 solid-phase extraction. LC-MS analysis was performed on a Q Exactive mass spectrometer, and data were analyzed using MASCOT software.

### **Hematoxylin and eosin staining of major organs**

The tissue samples were fixed with 4% paraformaldehyde and dehydrated, embedded, sectioned, and stained with hematoxylin and eosin. Finally, the sections were imaged through an optical microscope (Leica, DM2500).

### **Assessment of intracellular ROS level**

ROS levels in LX-2 cells were measured using a commercial ROS indicator DCFH-DA. Cells were incubated with  $15 \mu\text{M}$  DCFH-DA at  $37^\circ\text{C}$  for 30 minutes, followed by fluorescence imaging and measurement of fluorescence intensity. The excitation wavelength was 488 nm, and the emission window was 490-550 nm.

### **Statistical analysis**

The data for each group were accumulated from at least three independent experiments and expressed as the mean  $\pm$  S.D.. For each experiment, unless otherwise noted, n represents the number of independent replicates per experiment. The Student's t-test was used for comparisons between two groups of experiments. Statistically significant P values are indicated in the Figures and legends as  $***P < 0.001$ ,  $**P < 0.01$ .

## Supplemental Table and Figures

**Table S1.** Photophysical data of H<sub>2</sub>O<sub>2</sub>-activated BES1 in low and high viscosity environments.

| Solvents     | $\Phi^{[a]}$ | $\tau^{[b]}$ (ns) | radiative decay rate | nonradiative        |
|--------------|--------------|-------------------|----------------------|---------------------|
|              |              |                   | constant             | decay rate constant |
|              |              |                   | (s <sup>-1</sup> )   | (s <sup>-1</sup> )  |
| 0% Glycerol  | 0.015        | 0.472             | $3.178 \times 10^7$  | $2.087 \times 10^9$ |
| 90% Glycerol | 0.14         | 0.563             | $2.487 \times 10^8$  | $1.528 \times 10^9$ |

[a] fluorescence quantum yield; [b] fluorescence lifetime;  $k_r = \Phi/\tau$  (radiative decay coefficients);  $k_{nr} = 1/\tau - k_r$  (nonradiative decay coefficients). Data were recorded in glycerol/PBS at 25 °C after incubation with 100  $\mu$ M of H<sub>2</sub>O<sub>2</sub>.

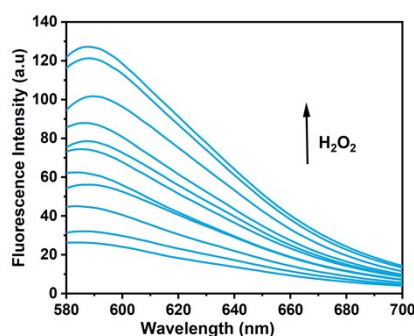

**Fig. S1.** Fluorescence response of BES1 (10  $\mu$ M) in the presence of H<sub>2</sub>O<sub>2</sub> (0-200  $\mu$ M) at various concentrations.  $\lambda_{ex/em}$ =520/590 nm.

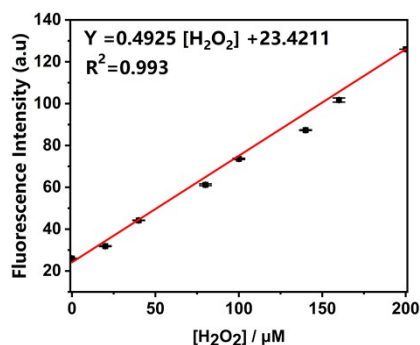

**Fig. S2.** The linear relationship between fluorescence intensity of BES1 (10  $\mu$ M) and H<sub>2</sub>O<sub>2</sub> concentrations (0-200  $\mu$ M).  $\lambda_{ex/em}$ =520/590 nm. The data are expressed as the mean  $\pm$  S.D. (n = 3 independent experiments).

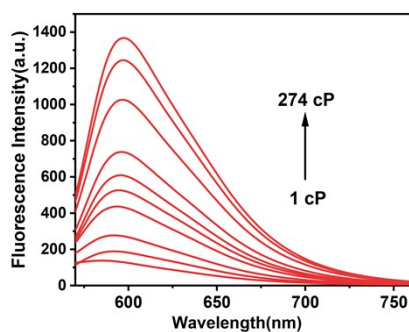

**Fig. S3.** Fluorescence response of H<sub>2</sub>O<sub>2</sub>-activated BESl (10 μM) in environments of varying viscosities.  $\lambda_{\text{ex}}=520$  nm.

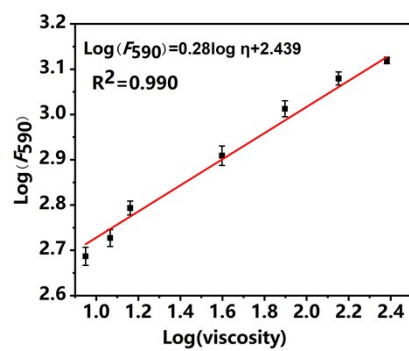

**Fig. S4.** A linear relationship between log F<sub>590</sub> of H<sub>2</sub>O<sub>2</sub>-activated BESl (10 μM) and log viscosity (1 cP-274 cP).  $\lambda_{\text{ex/em}}=520/590$  nm. The data are expressed as the mean  $\pm$  S.D. (n = 3 independent experiments).

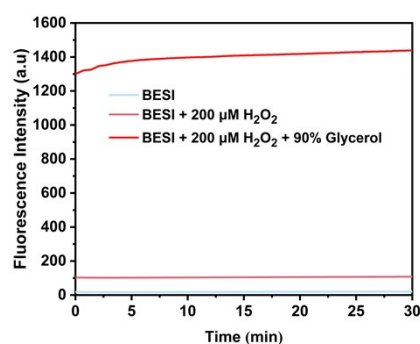

**Fig. S5.** Time course of fluorescence changes of 10 μM BESl in PBS buffer, H<sub>2</sub>O<sub>2</sub> (200 μM), or H<sub>2</sub>O<sub>2</sub> (200 μM) coexisting with 90% glycerol.  $\lambda_{\text{ex/em}}=520/590$  nm.

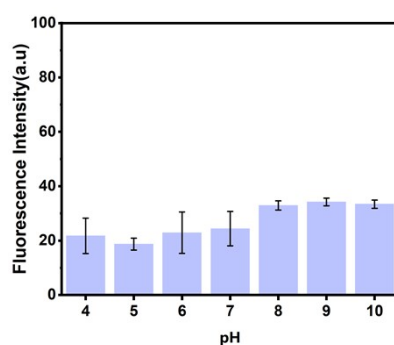

**Fig. S6.** Fluorescence of BES1 (10  $\mu$ M) at different pH values.  $\lambda_{\text{ex/em}}=520/590$  nm. The data are expressed as the mean  $\pm$  S.D. (n = 3 independent experiments).

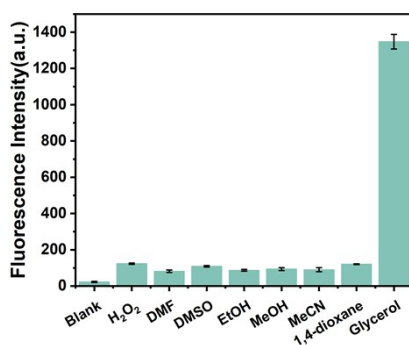

**Fig. S7.** Fluorescence of BES1 (10  $\mu$ M) in different polar solvents (Blank, 200  $\mu$ M H<sub>2</sub>O<sub>2</sub>, DMF, DMSO, EtOH, MeOH, MeCN, 1,4-dioxane, and coexisting 200  $\mu$ M H<sub>2</sub>O<sub>2</sub> and 90% glycerol).  $\lambda_{\text{ex/em}}=520/590$  nm. The data are expressed as the mean  $\pm$  S.D. (n = 3 independent experiments).

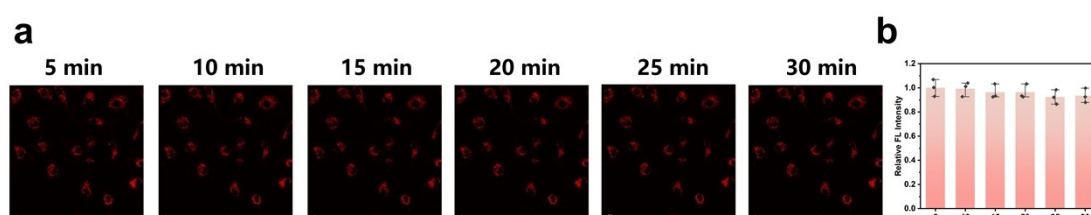

**Fig. S8.** The photostability of BES1 in LX-2 cells. (a) LX-2 cells incubated with 2  $\mu$ g/mL LPS for 3 hours were subjected to fluorescence imaging, with BES1 (15  $\mu$ M) added 30 minutes before imaging. (b) Relative fluorescence intensity output of a.  $\lambda_{\text{ex}}=561$  nm,  $\lambda_{\text{em}}=580-640$  nm. The data are expressed as the mean  $\pm$  S.D. (n = 3 independent experiments).

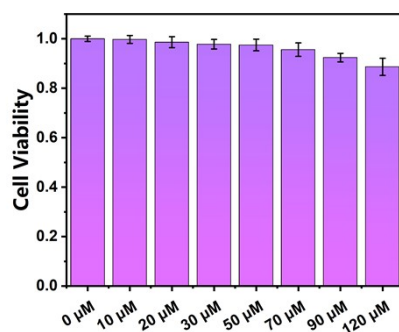

**Fig. S9.** Cell viability of BES1 towards LX-2 cells with an incubation time of 12 h. The data are expressed as the mean  $\pm$  S.D. (n = 3 independent experiments).

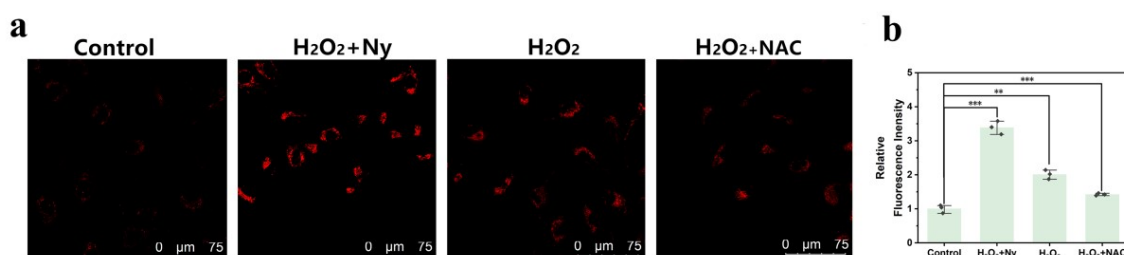

**Fig. S10.** Fluorescence imaging of living HSC. (a) Cascade-responsive fluorescence imaging in LX-2 cells pre-incubated with 15  $\mu$ M BES1 under different treatments: Control, 200  $\mu$ M H<sub>2</sub>O<sub>2</sub> + 20  $\mu$ M nystatin (Ny), 200  $\mu$ M H<sub>2</sub>O<sub>2</sub>, and 200  $\mu$ M H<sub>2</sub>O<sub>2</sub> + 1 mM N-acetyl-L-cysteine (NAC). (b) Relative fluorescence intensity output of a. The data are expressed as the mean  $\pm$  S.D. (n = 3 independent experiments). \*\*P < 0.01, \*\*\*P < 0.001.

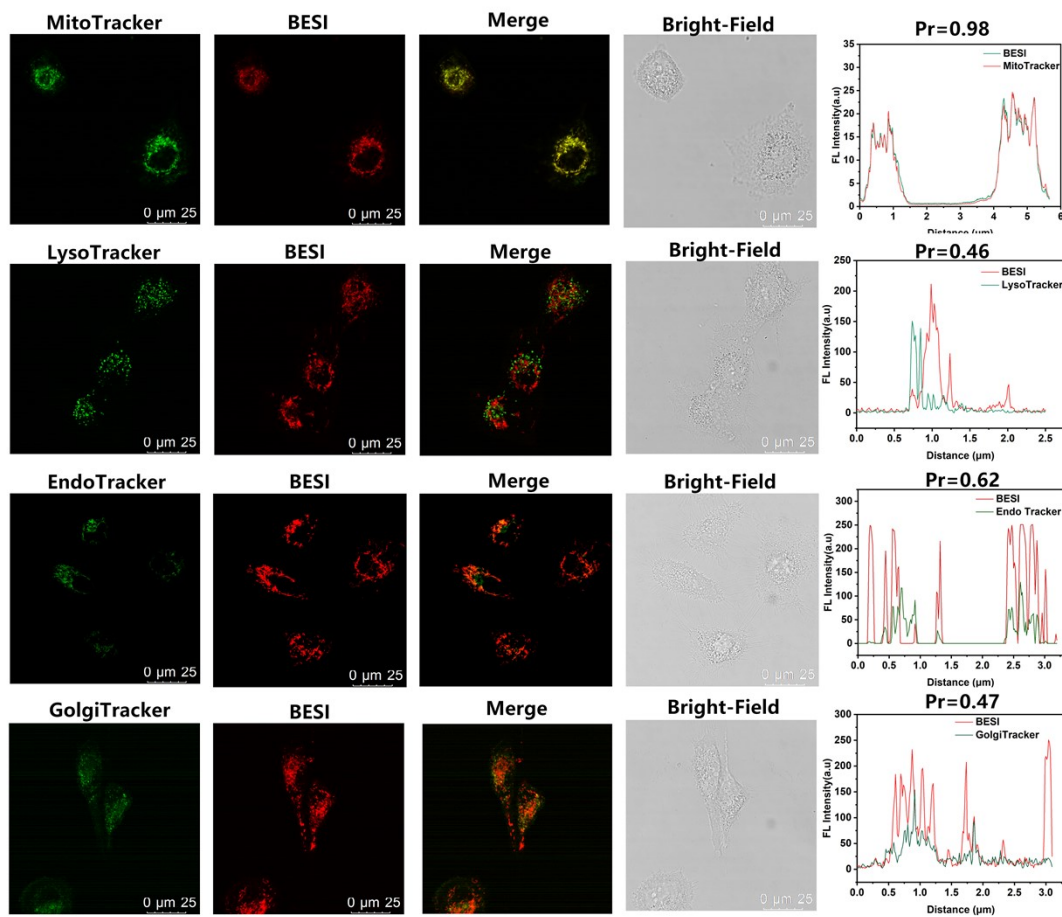

**Fig. S11.** Fluorescence imaging of LX-2 cells co-incubated with 15  $\mu\text{M}$  BES I and commercial organelle green fluorescent dyes. All collection windows were 500-520 nm with excitation at 488 nm for 75 nM MitoTracker Green, 75 nM LysoTracker Green, 100 nM EndoTracker Green, and 100 nM GolgiTracker Green.

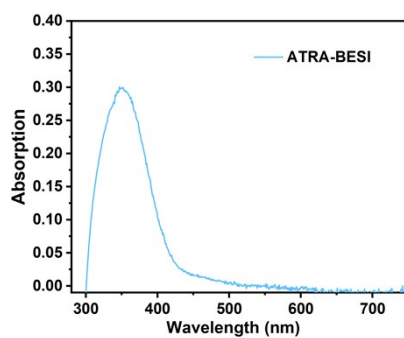

**Fig. S12.** The absorption spectrum of 90 ng/mL ATRA-BESI in 10 mM PBS buffer

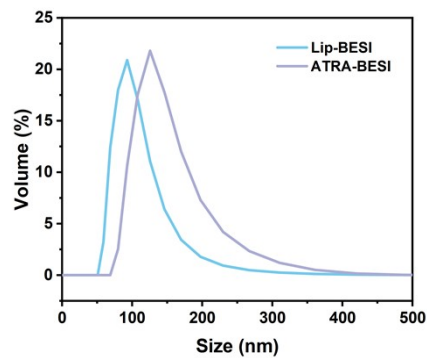

**Fig. S13.** Particle size distribution of ATRA-BESI and Lip-BESI in aqueous solution.

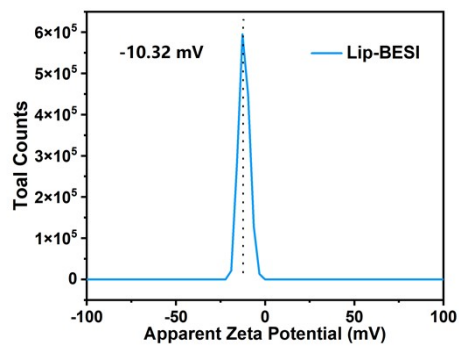

**Fig. S14.** Zeta potential distribution of Lip-BESI.

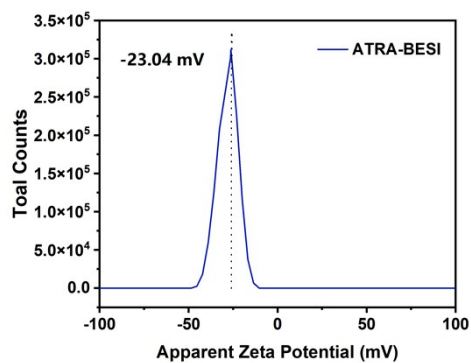

**Fig. S15.** Zeta potential distribution of ATRA-BESI.

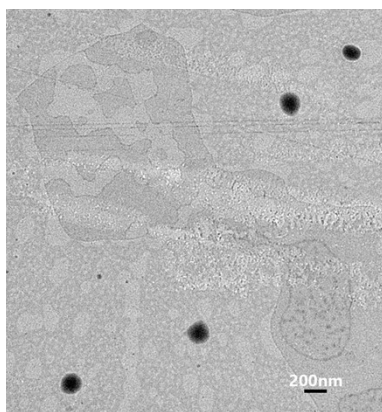

**Fig. S16.** Low-magnification transmission electron microscopy image of ATRA-BESI.

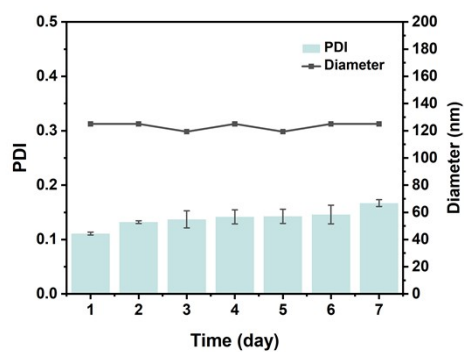

**Fig. S17.** The particle size and PDI of ATRA-BESI in aqueous solution over 7 days. The data are expressed as the mean  $\pm$  S.D. (n = 3 independent experiments).

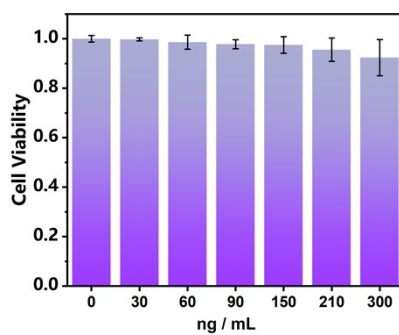

**Fig. S18.** Cell viability of ATRA-BESI towards LX-2 cells with an incubation time of 12 h. The data are expressed as the mean  $\pm$  S.D. (n = 3 independent experiments).

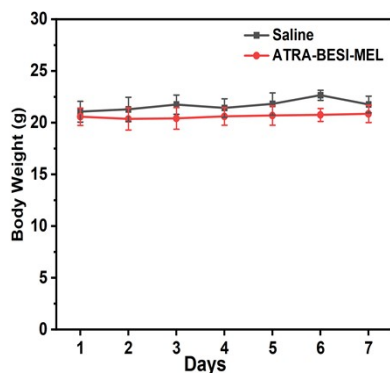

**Fig. S19.** Effect of ATRA-BESI (150  $\mu$ M) and saline on the body weight of mice over two weeks.

The data are expressed as the mean  $\pm$  S.D. (n = 3 independent experiments).

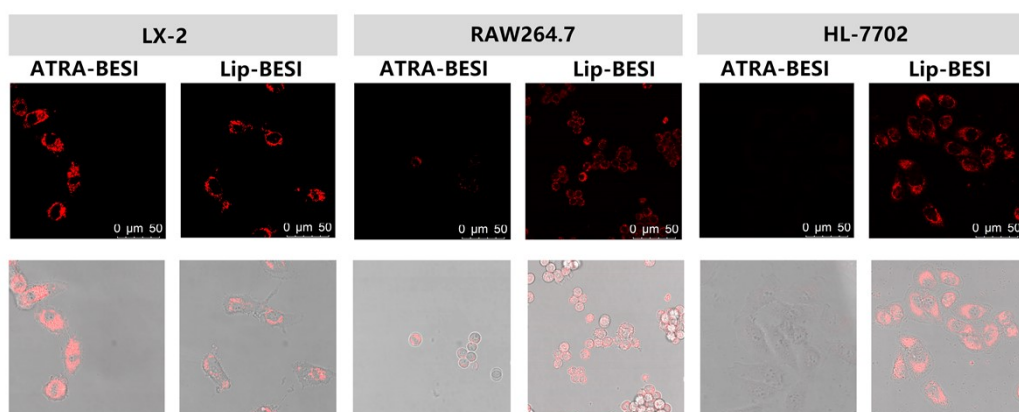

**Fig. S20.** Imaging of LX-2, HL-7702, and Raw 264.7 cells pre-stimulated with 2  $\mu$ g/mL LPS for 3 h, followed by co-incubation with 20  $\mu$ M ATRA-BESI or Lip-BESI for 30 minutes. The red channel excitation wavelength was 561 nm, with collection at 580–640 nm. The data are expressed as the mean  $\pm$  S.D. (n = 3 independent experiments).

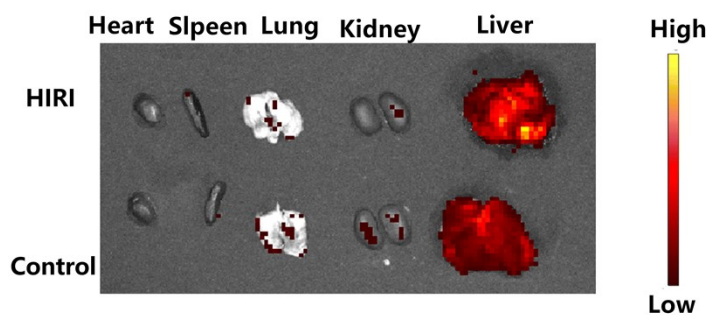

**Fig. S21.** In vivo fluorescence images of major organs dissected from mice.

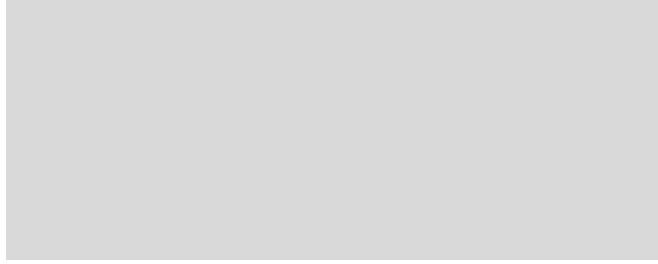

**Fig. S22.** H&E staining of liver tissues.

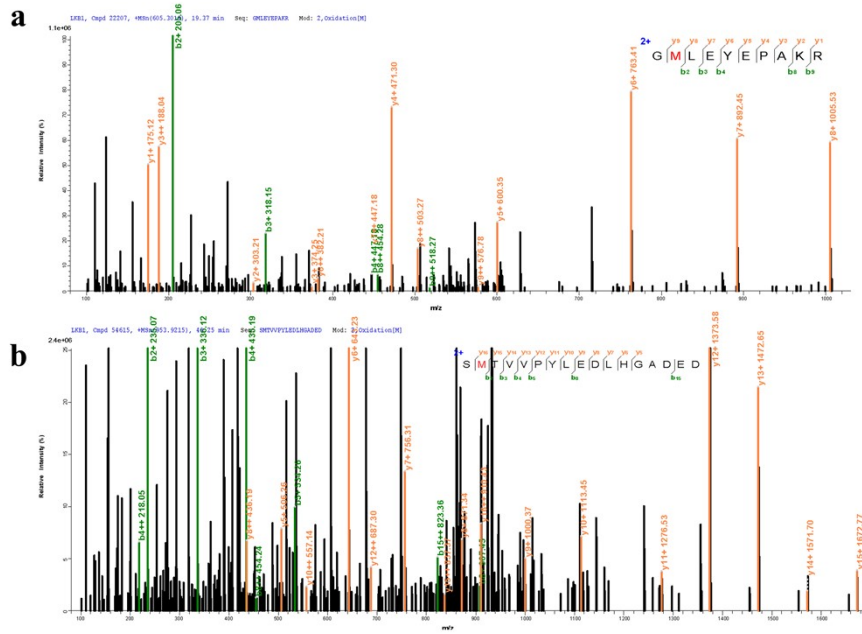

**Fig. S23.** Proteomic analysis of the reaction of LKB1 with  $H_2O_2$  through LC-MS/MS. Amino acids labeled with red color denote modification by  $H_2O_2$ .

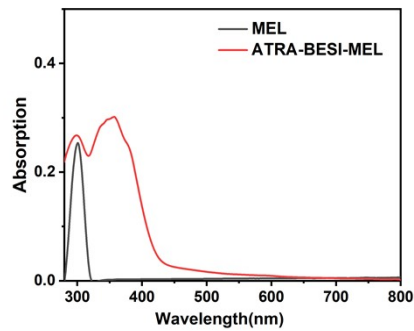

**Fig. S24.** The absorption spectra of ATRA-BESI-MEL and MEL.

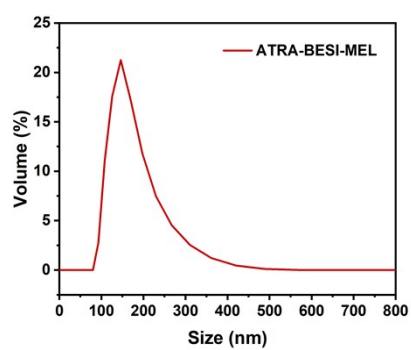

**Fig. S25.** Particle size distribution of ATRA-BESI-MEL in aqueous solution.

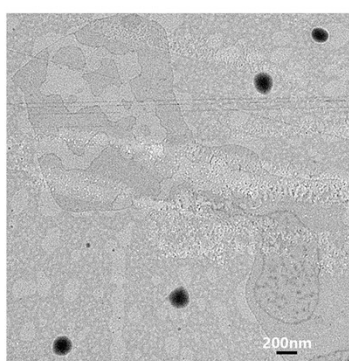

**Fig. S26.** Low-magnification transmission electron micrograph of ATRA-BESI-MEL.

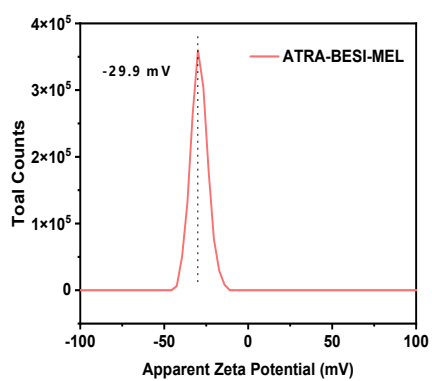

**Fig. S27.** Zeta potential distribution of ATRA-BESI-MEL in aqueous solution.

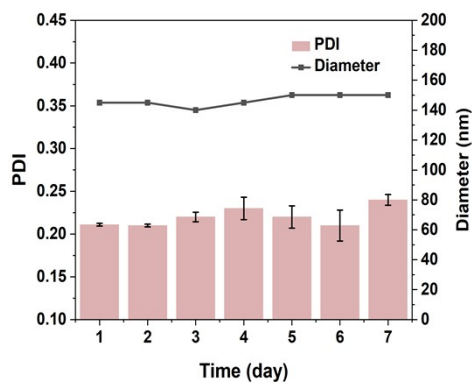

**Fig. S28.** Polydispersity index (PDI) and particle size determination of ATRA-BESI-MEL in aqueous solution over 7 days. The data are expressed as the mean  $\pm$  S.D. (n = 3 independent experiments)

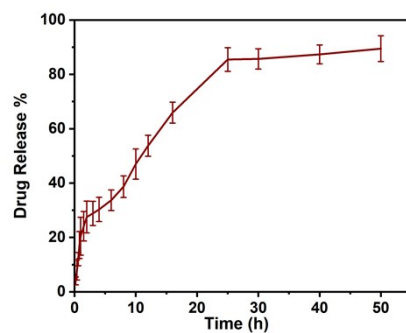

**Fig. S29.** The drug release curve of ATRA-BESI-MEL in 10 mM PBS Buffer at pH=7.4. The data are expressed as the mean  $\pm$  S.D. (n = 3 independent experiments).

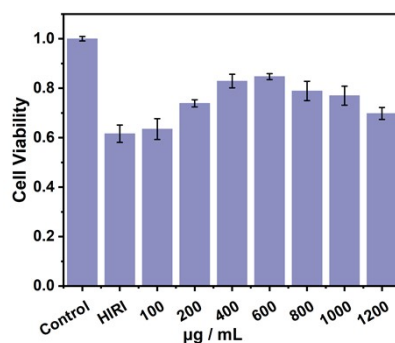

**Fig. S30.** The assessment of cell viability in LX-2 cells subjected to IR treated with different concentrations of ATRA-BESI-MEL. The data are expressed as the mean  $\pm$  S.D. (n = 3 independent experiments).

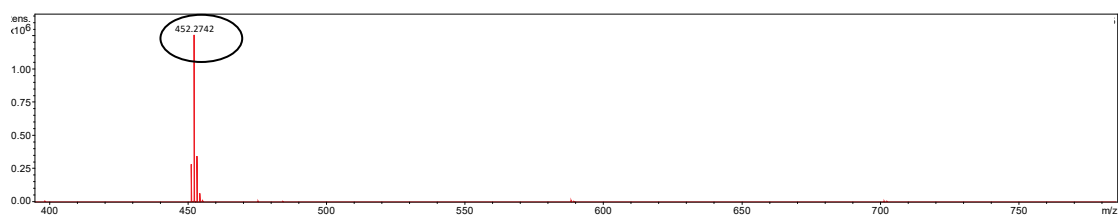

**Fig. S31.** HRMS of the BES1.

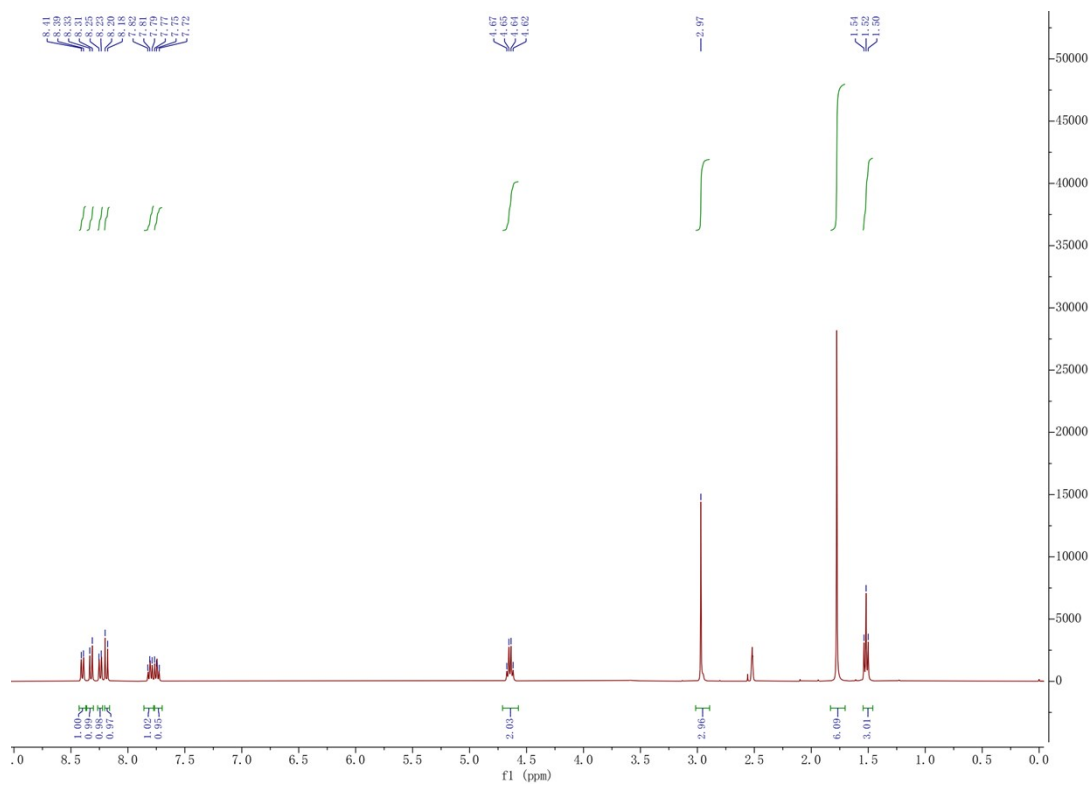

**Fig. S32.** <sup>1</sup>H NMR (400 MHz, DMSO-d<sub>6</sub>) of compound 1.



## References

- 1 J. Liu, W. Zhang, C. Zhou, M. Li, X. Wang, W. Zhang, Z. Liu, L. Wu, T. D. James, P. Li and B. Tang, *J. Am. Chem. Soc.*, 2022, **144**, 13586-13599.
- 2 H. Maeda, K. Yamamoto, Y. Nomura, I. Kohno, L. Hafsi, N. Ueda, S. Yoshida, M. Fukuda, Y. Fukuyasu, Y. Yamauchi. *J. Am. Chem. Soc.*, 2005, **127**, 68-69.
- 3 D. Oushiki, H. Kojima, T. Terai, M. Arita, K. Hanaoka, Y. Urano, T. Nagano. *J. Am. Chem. Soc.*, 2010, **132**, 2795-2801.
- 4 B. C. Chen, C. D. Li, J. Zhang, J. F. Kan, T. T. Jiang, J. Zhou and H. M. Ma, *Chem. Commun.*, 2019, **55**, 7410-7413.
- 5 X. Li, D. Xu, A. Wang, C. Peng, X. Liu and J. Luo, *Green. Energy. Environ.*, 2024, **9**, 1592-1600.
